# Supplementary material for: One-step fabrication of recyclable and robust fluorine/polymer-free superhydrophobic fabrics
Source: Royal Society of Chemistry journal article supplement (doi:10.1039/c7ra02276j), 2017-01-01
Supplement: c7ra02276j4.pdf [file c7ra02276j4.pdf]

## Supporting Information

# **One-Step Fabrication of Recyclable and Robust Fluorine/Polymer-Free Superhydrophobic Fabrics**

Sheng Wang\*, Sanding Wu, Jiazhang Zhang, Tao Wang\*

\*e-mail: [wangsheng571@hotmail.com](mailto:wangsheng571@hotmail.com); [taotao571@hotmail.com](mailto:taotao571@hotmail.com)

*Key Laboratory of Advanced Textile Materials and Manufacturing Technology, Zhejiang Sci-Tech University, Hangzhou 310018, China*

## **Table of Contents**

- S1. XPS Survey Spectra of the P25 and P25-VH Samples.
- S2. Digital Photograph of the TiO<sub>2</sub>-Loaded Polyester Fabric at 230 °C.
- S3. Chang of loading rate and CA of the P25-VH/polyester fabric with laundering cycles.
- S4. Water vapor transmissibility.
- S5. CA of a Water Droplet for the P25-VH/Nylon 6 Sample.
- Movie Legends

# **S1. XPS Survey Spectra of the P25 and P25-VH Samples.**

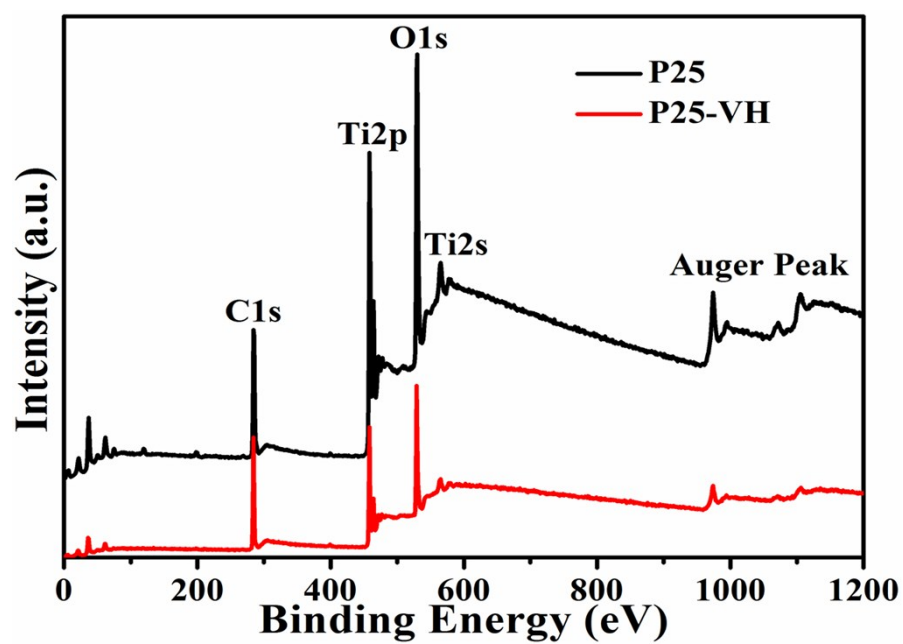

**Fig. S1** XPS survey spectra of P25 and P25-VH samples.

**S2. Digital Photograph of the TiO<sub>2</sub> Loaded Polyester Fabric at 230 °C.**

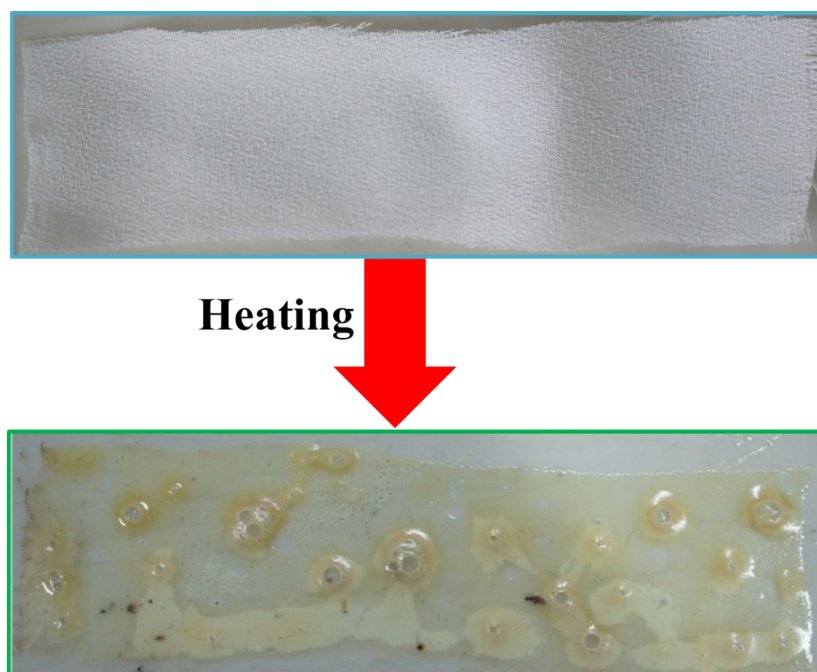

**Fig. S2** Digital photograph of the TiO<sub>2</sub>-loaded polyester fabric at 230 °C for 3 h.

**S3. Chang of loading rate and CA of the P25-VH/polyester fabric with laundering cycles.**

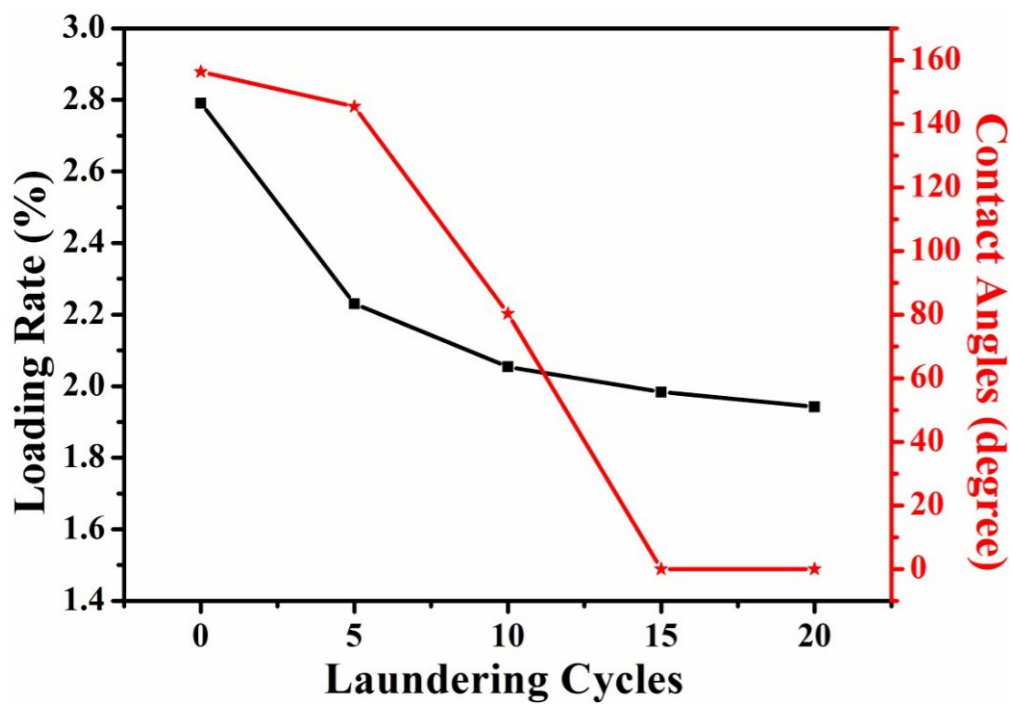

**Fig.S3** Chang of loading rate and CA of the P25-VH/polyester fabric with laundering cycles.

#### S4. Water vapor transmissibility.

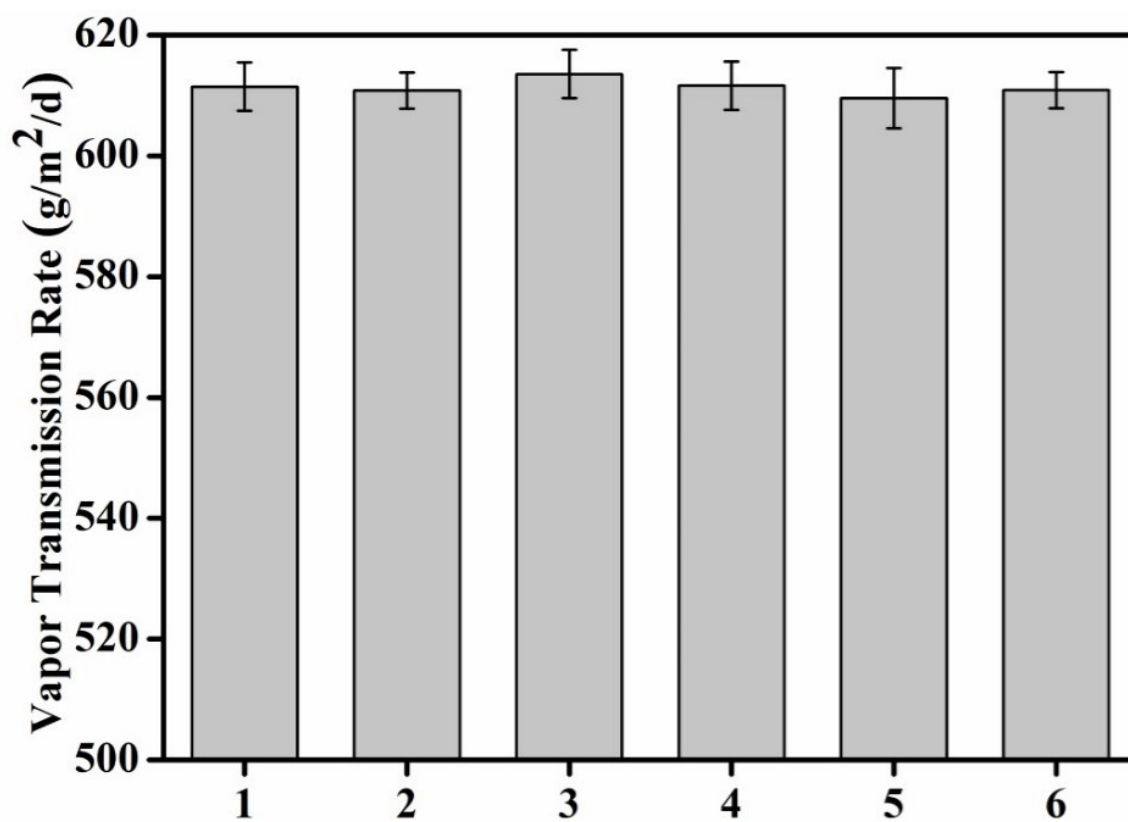

**Fig.S4** Water vapor transmission rate of pristine polyester fabric and the P25-VH/polyester fabric with different laundering cycles. The bars refer to the pristine polyester fabric (1), the P25-VH/polyester fabric with 0, 5, 10, 15, 20 laundering cycles (2-5), respectively.

**S5. CA of a Water Droplet for the P25-VH/Nylon 6 sample.**

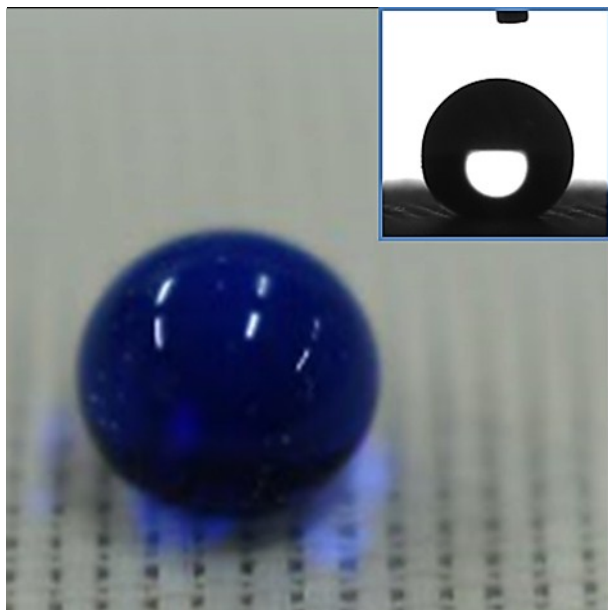

**Fig. S5** CA of a water droplet for P25-VH/nylon 6.

## **Movie Legends**

**Movie S1.** This video illustrates the knife-scratch tests on the superhydrophobic fabric..

**Movie S2.** This video illustrates the sandpaper-abrasion tests on the superhydrophobic fabric.

**Movie S3.** This video illustrates the selective oil–water separation using superhydrophobic fabric.
